# Supplementary material
Source: MDPI journal article supplement (https://www.mdpi.com/1996-1073/14/16/5174)
Supplement: s1 [file s1]

## Article

# Use of CO<sub>2</sub> to Cure Steel Slag and Gypsum-Based Material

Xue Wang <sup>1,2</sup>, Wen Ni <sup>1,2,\*</sup>, Jiajie Li <sup>1,2</sup>, Siqi Zhang <sup>1,2</sup>, Keqing Li <sup>1,2</sup> and Wentao Hu <sup>1,2</sup>

<sup>1</sup> School of Civil and Resource Engineering, University of Science and Technology Beijing, Beijing 100083, China; 18810613427@163.com (X.W.); jiajieli@ustb.edu.cn (J.L.); zsq2017@ustb.edu.cn (S.Z.); lkqing2003@163.com (K.L.); wthu010@ustb.edu.cn (W. H.)

<sup>2</sup> Key Laboratory of Resource-Oriented Treatment of Industrial Pollutants, Beijing 100083, China

\* Correspondence: niwen@ces.ustb.edu.cn

## Supplementary material

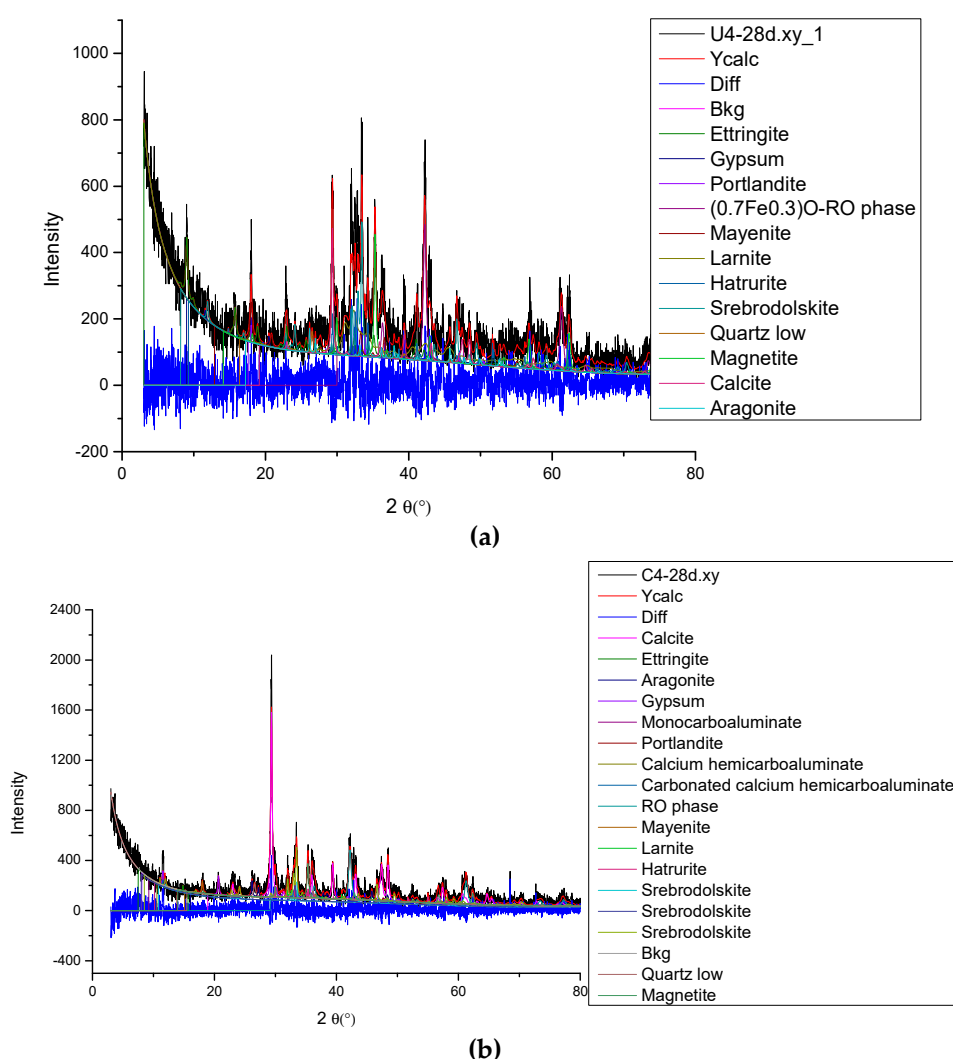

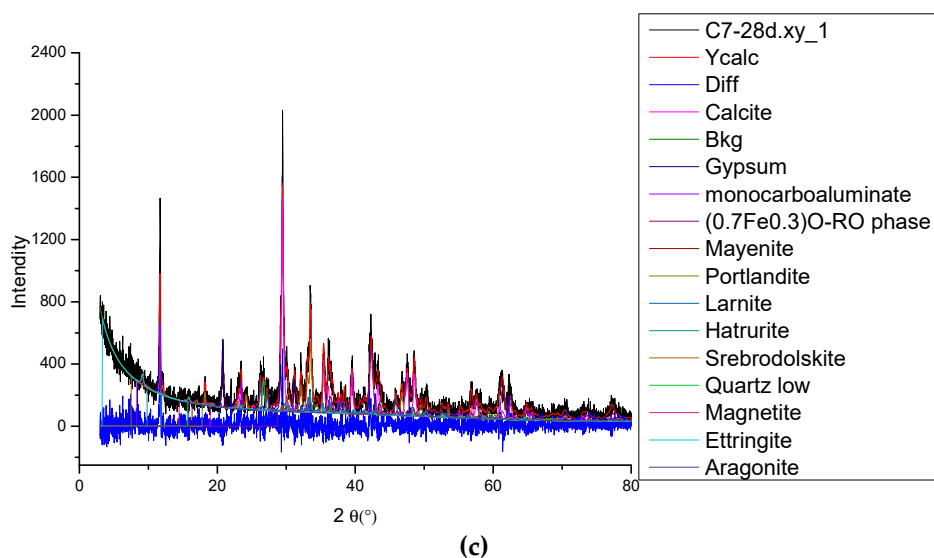

Figure S1. QXRD analysis results for (a) U4-28d; (b) C4-28d; (c) C7-28d.

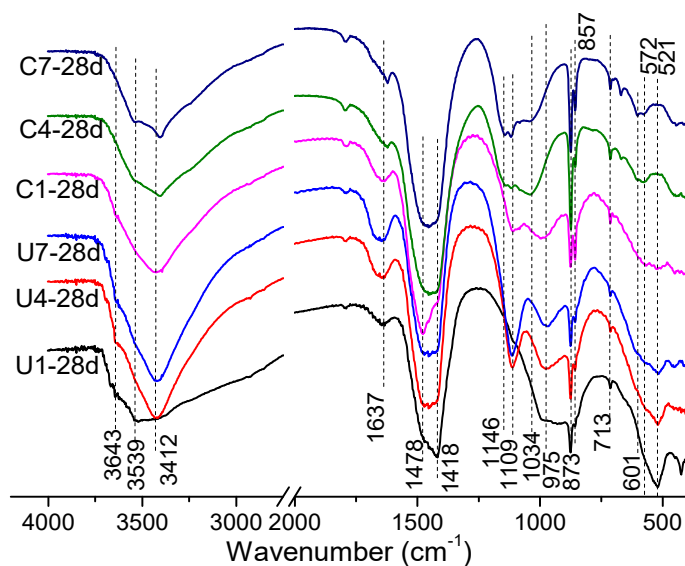

Figure S2. Results of FTIR analysis at 28 d.

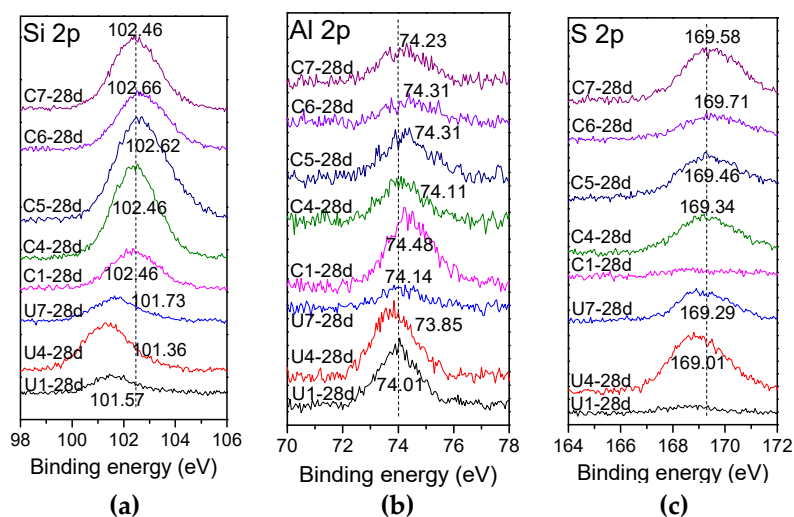

Figure S3. XPS analysis results of samples: (a) Si 2p, (b) Al 2p, (c) S 2p.
